# Supplementary material for: IL-37 Expression Reduces Lean Body Mass in Mice by Reducing Food Intake
Source: MDPI journal article supplement (doi:10.3390/ijms19082264), 2018-08-02
Supplement: s1 [file s1]

## Supplementary data

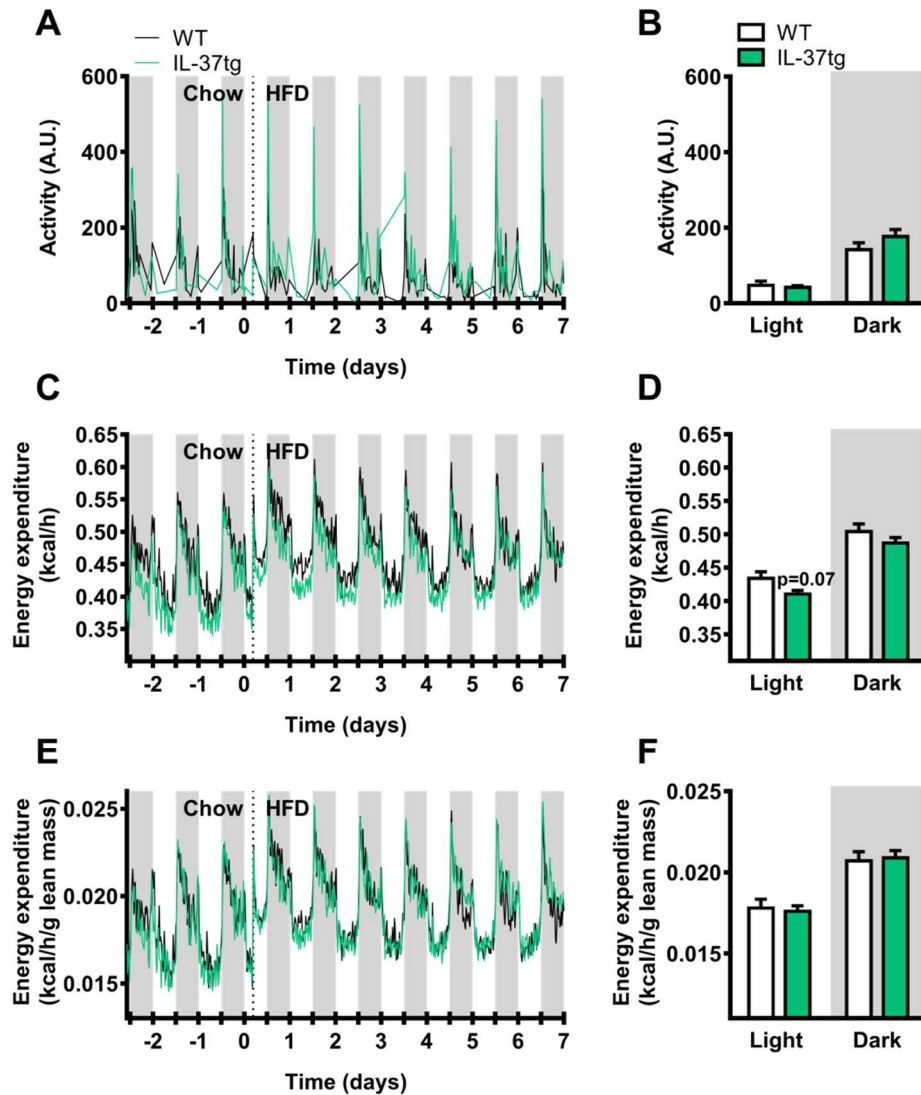

**Figure S1.** Heterozygous IL-37 expression decreases energy expenditure in conjunction with lean mass reduction. 10-week old male C57Bl/6J mice and heterozygous IL-37tg mice on a C57Bl/6J background were fed a high-fat diet (HFD). From 2 days before initiation of HFD until 1 week after the switch to HFD, mice were housed in fully automatic metabolic cages, which measured oxygen uptake ( $V_{O_2}$ ) and carbon dioxide production ( $V_{CO_2}$ ). Physical activity (A,B) was measured with infrared sensor frames. Total energy expenditure (C,D) and the energy expenditure were corrected for lean mass (E,F) was calculated from  $V_{O_2}$  and  $V_{CO_2}$  using the Weir equation. Bar graphs were based on calculations of the mean from day 1.5 to 7. Values represent means (A,C,E) and bar graphs represent means  $\pm$  SEM (B,D,F) ( $n = 8$  animals per group).
